# Supplementary material for: Bio-inspired high performance electrochemical supercapacitors based on conducting polymer modified coral-like monolithic carbon
Source: Royal Society of Chemistry journal article supplement (doi:10.1039/c3ta11348e), 2013-01-01
Supplement: c3ta11348e.pdf [file c3ta11348e.pdf]

Cite this: DOI: 10.1039/c0xx00000x

www.rsc.org/xxxxxx

**ARTICLE TYPE**

# Bio-inspired High Performance Electrochemical Supercapacitor based on Conducting Polymer modified Coral-like Monolithic Carbon

Yuchao Wang, Shengyang Tao\*, Yonglin An, Shuo Wu and Changgong Meng

Received (in XXX, XXX) Xth XXXXXXXXXX 20XX, Accepted Xth XXXXXXXXXX 20XX

DOI: 10.1039/b000000x

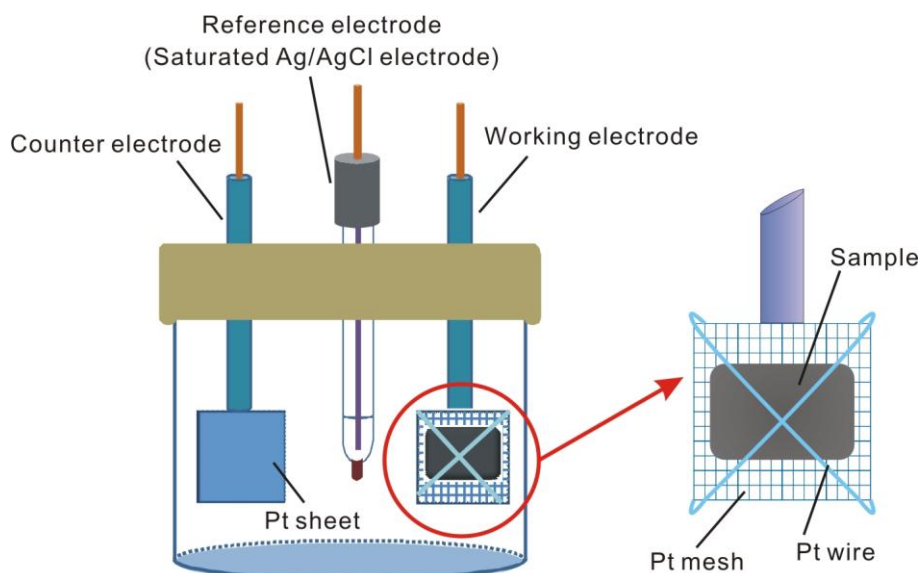

Figure S1. The illustration of three-electrode cell system.

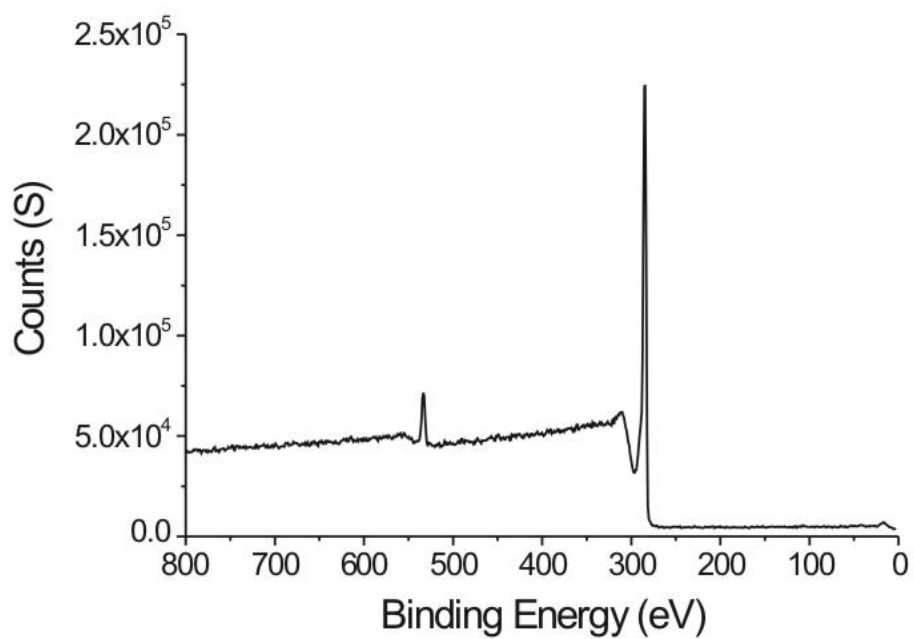

**Figure S2.** The X-ray photoelectron spectroscopy (XPS) curve of coral-like carbon.

**Table S1.** The abbreviations of hybrid materials by oxidative polymerization

| Sample |                                                         | The amount of aniline ( $\mu\text{L}$ ) | Conducting polymer |
|--------|---------------------------------------------------------|-----------------------------------------|--------------------|
| C-CA1  |                                                         | 20                                      | PANi (Polyaniline) |
| C-CA2  | C-CA (Carbon composited with PANi by Chemical oxidative | 60                                      | PANi               |
| C-CA3  | polymerization)                                         | 100                                     | PANi               |
| C-CA4  |                                                         | 140                                     | PANi               |

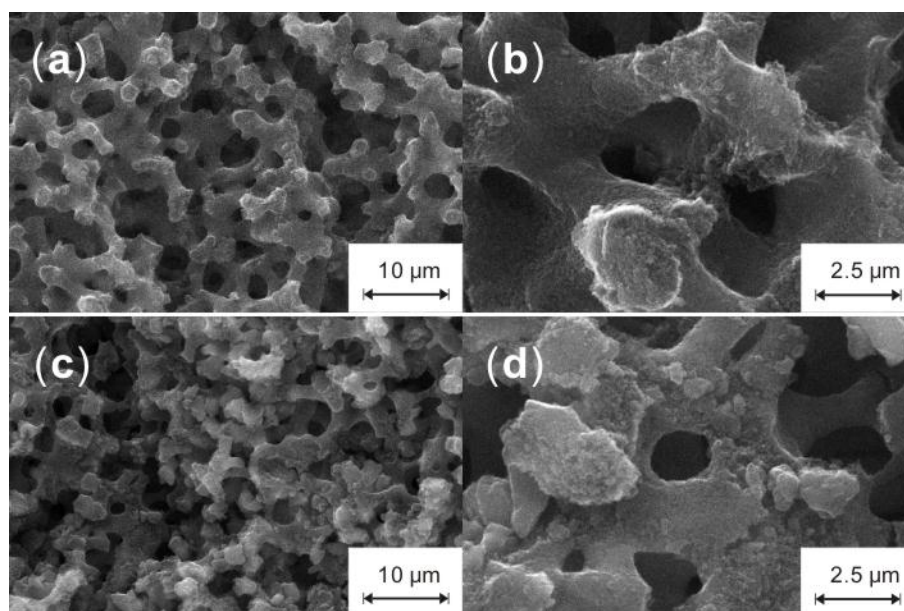

**Figure S3.** SEM images of C-CA1 (a, b) and C-CA3 (c, d)

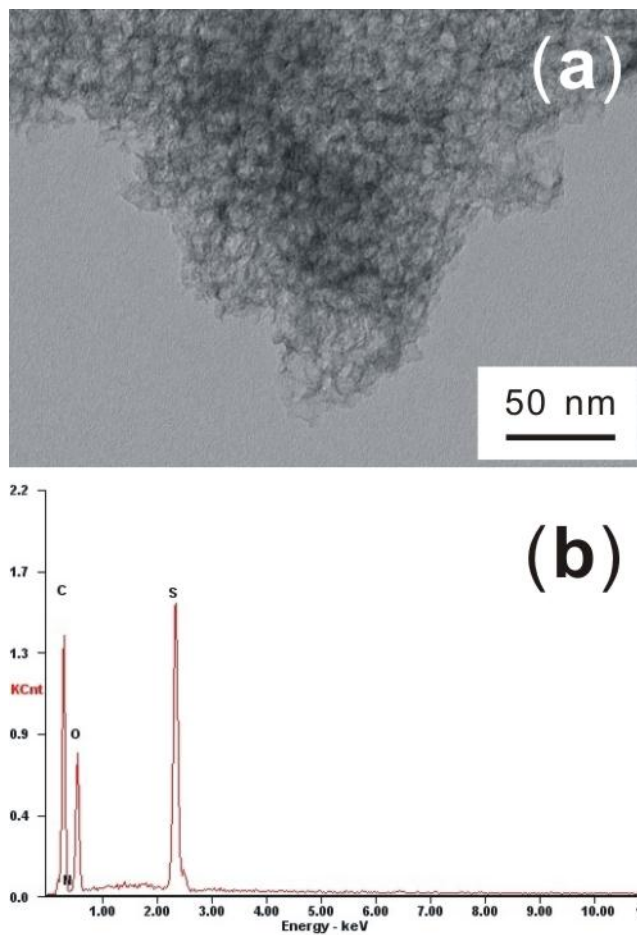

Figure S4. TEM image (a) and the energy dispersive X-ray (EDX) spectra (b) of C-ET3

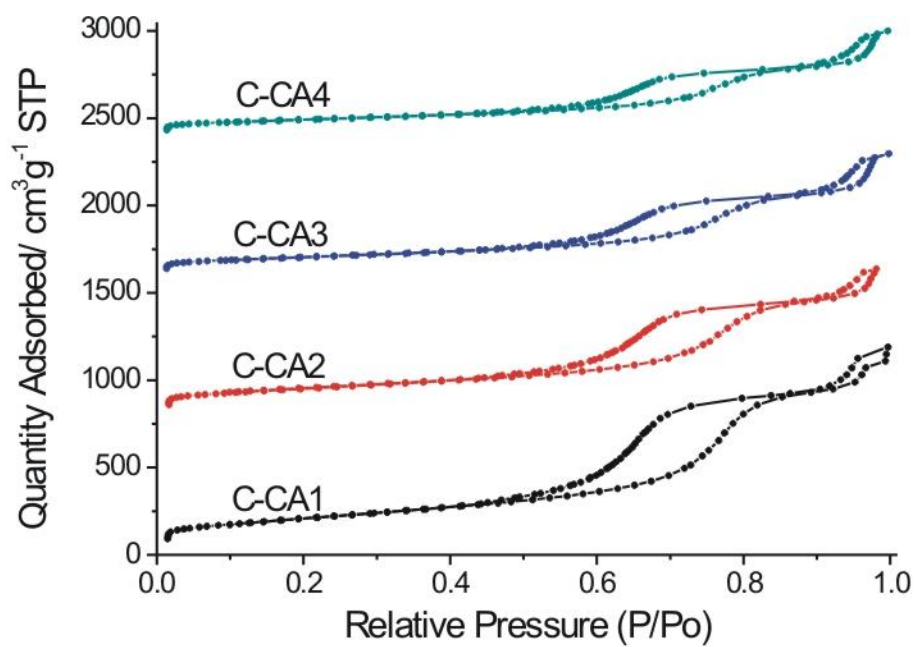

**Figure S5.** N<sub>2</sub> adsorption-desorption isotherms of hybrid materials. The data are shifted by 800 cm<sup>3</sup> g<sup>-1</sup> STP relative to each other for clarity.

**Table S2.** Structural Properties of the hybrid materials

---

| Sample | S <sub>BET</sub> (m <sup>2</sup> g <sup>-1</sup> ) | V <sub>p</sub> (cm <sup>3</sup> g <sup>-1</sup> ) | D <sub>p</sub> (nm) | Content of conducting polymer (wt %) <sup>a</sup> |
|--------|----------------------------------------------------|---------------------------------------------------|---------------------|---------------------------------------------------|
| C-CA1  | 715                                                | 1.89                                              | 6.51                | 21                                                |
| C-CA2  | 527                                                | 1.35                                              | 6.48                | 32                                                |
| C-CA3  | 367                                                | 1.19                                              | 6.28                | 39                                                |
| C-CA4  | 322                                                | 0.82                                              | 6.09                | 42                                                |

---

<sup>a</sup>Content of conducting polymer calculated from the formula:  $c(\text{wt}\%) = 1 - m_{\text{MC}} / m_{\text{total}}$

All the results above are the average values of three sets of test data.

---

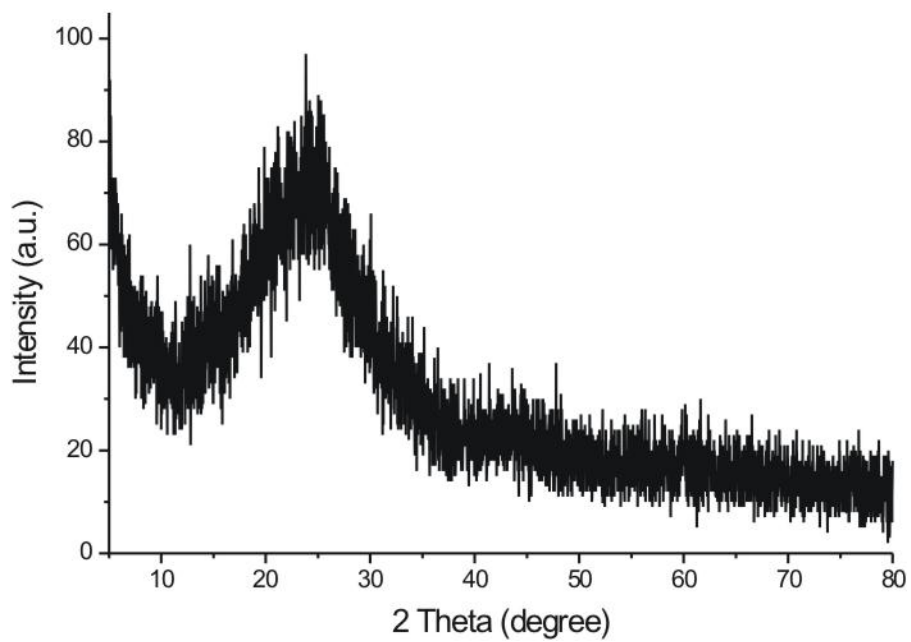

**Figure S6.** Wide-angle XRD patterns of C-CA3



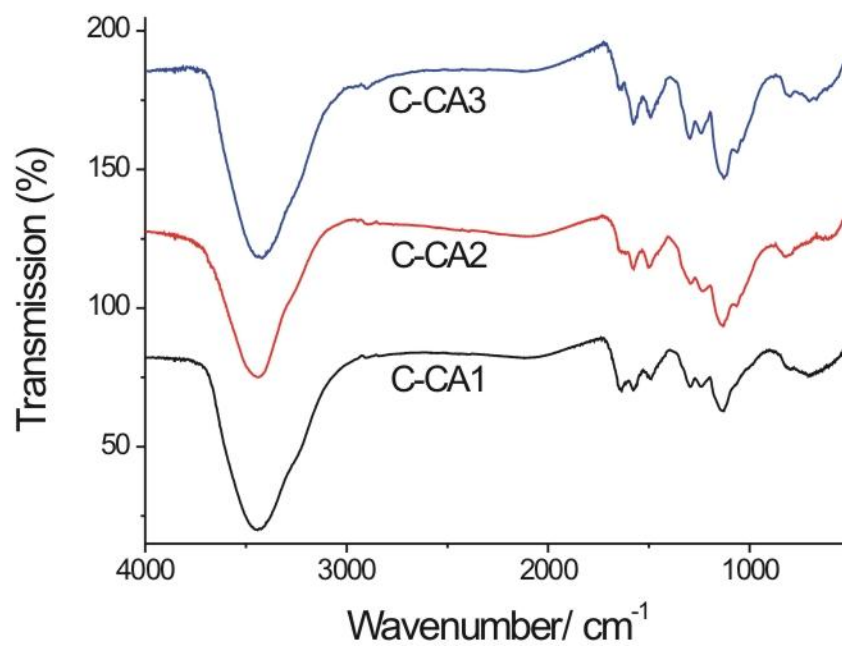

**Figure S7.** FTIR spectrum of PANi composites prepared by chemical oxidative polymerization. The data of FTIR are shifted by 50 relative to each other for clarity.

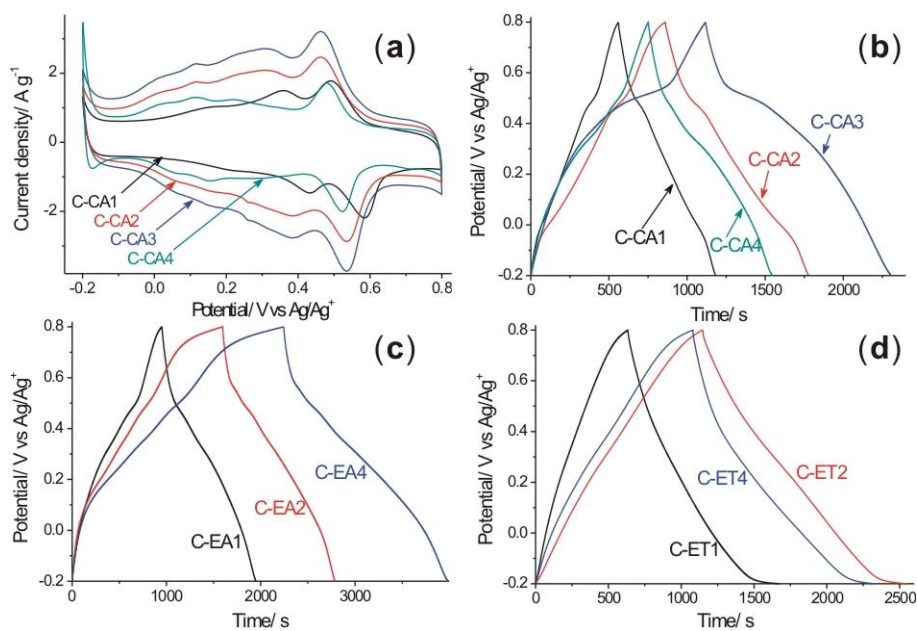

**Figure S8.** Cyclic voltammograms of C-CA at the scan rate of  $5 \text{ mV s}^{-1}$  (a) and galvanostatic charge-discharge curves of the hybrid materials (b-d) at the scan rate of  $0.5 \text{ A g}^{-1}$ .

**Table S3.** Capacitance performances of C-CA

| Sample | Specific capacitance ( $F\ g^{-1}$ ) |                  |                  |
|--------|--------------------------------------|------------------|------------------|
|        | $2.0\ A\ g^{-1}$                     | $1.0\ A\ g^{-1}$ | $0.5\ A\ g^{-1}$ |
| C-CA1  | 285                                  | 295              | 313              |
| C-CA2  | 384                                  | 425              | 459              |
| C-CA3  | 511                                  | 575              | 595              |
| C-CA4  | 338                                  | 360              | 397              |

The specific capacitances of as-prepared samples above were obtained at different current densities using 2 M  $H_2SO_4$  as electrolyte.

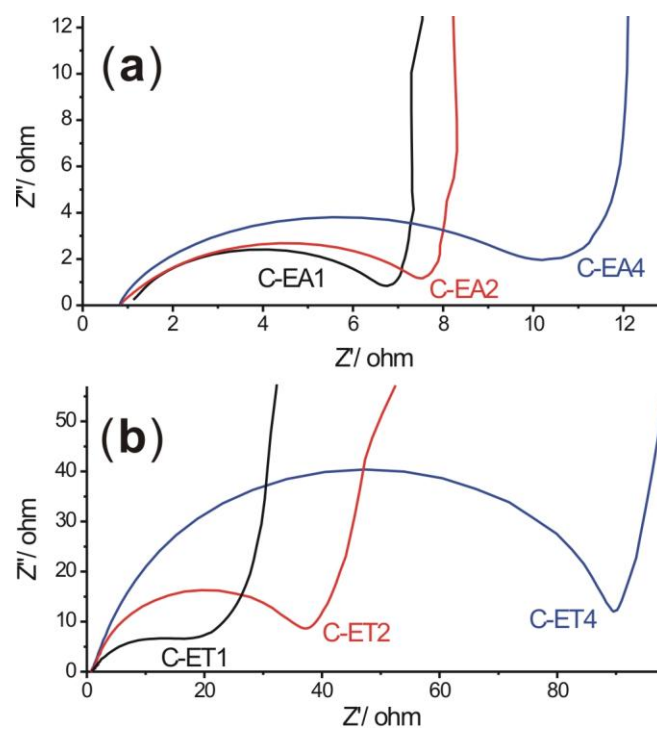

**Figure S9.** The Nyquist plots in the range of 10 kHz to 10 mHz for C-EA and C-ET.

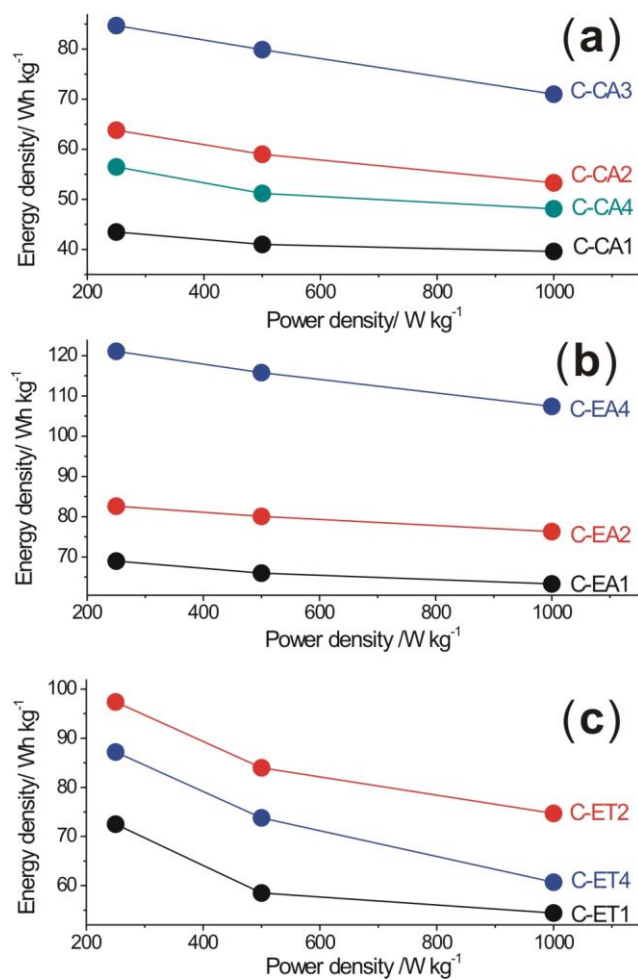

Figure S10. Ragone plots of the hybrid materials.

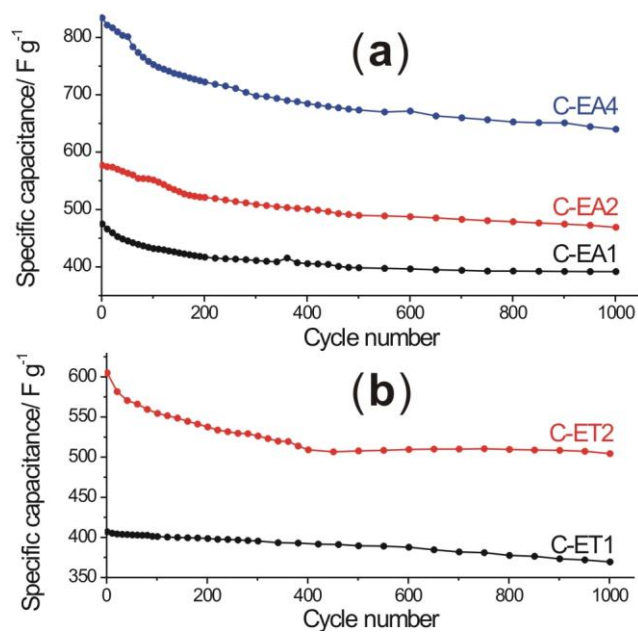

Figure S11. Cycling performance at  $1.0 A g^{-1}$  of C-EA and C-ET.
